# Supplementary material
Source: PubMed Central journal article supplement (PMC5462453)

# Supplemental Fig. 1

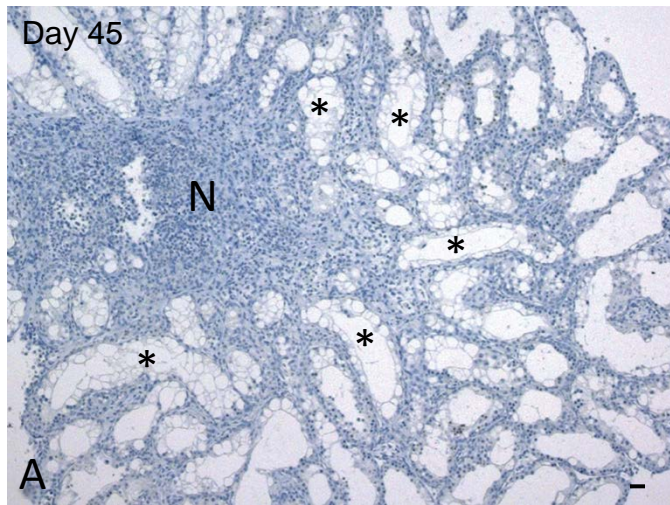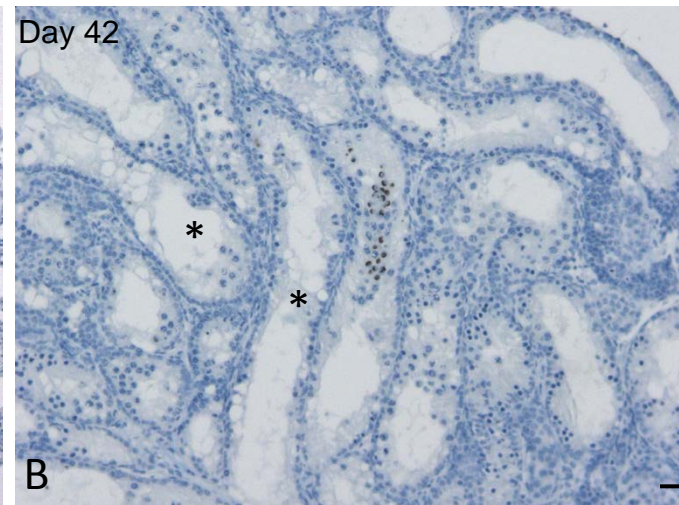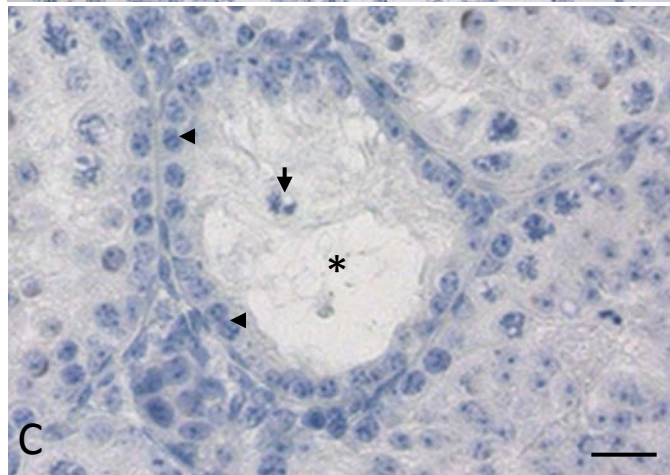

Supplemental Fig. 2

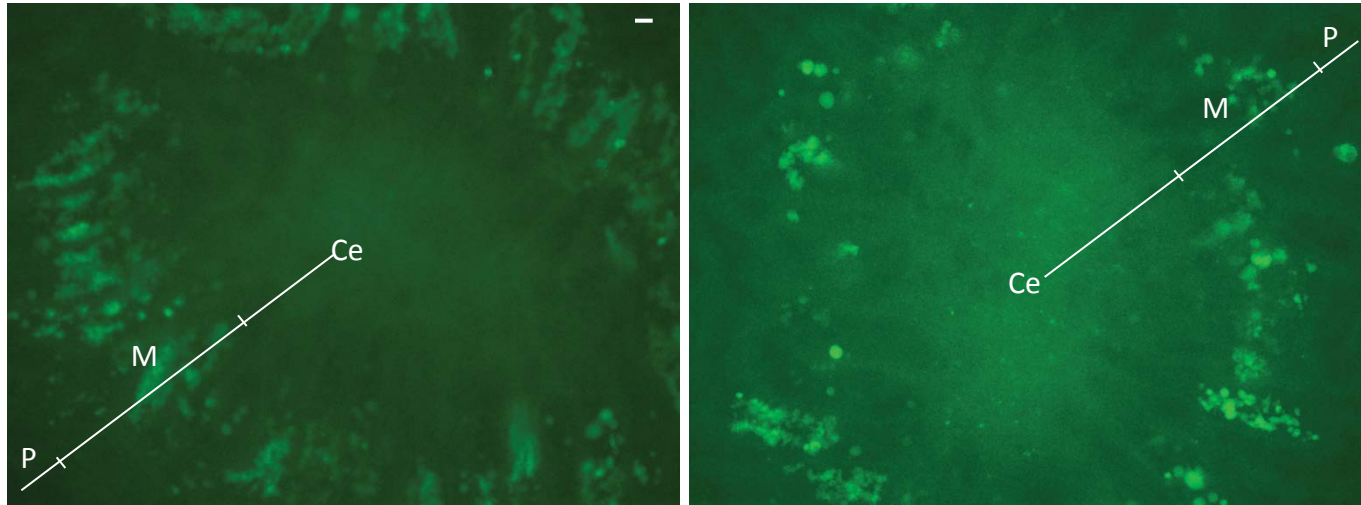

Supplement: NIHMS861630-supplement-Figures.pdf [file NIHMS861630-supplement-Figures.pdf]
